# Supplementary material
Source: PubMed Central journal article supplement (PMC5042309)
Supplement: Supplementary_Table_1_117.pdf [file Supplementary_Table_1_117.pdf]

**Supplementary Table 1.** Quality assessment scores according with the Newcastle-Ottawa scales. The numbers in commas indicate the maximum possible score for each evaluated item. For both case-control and cross-sectional studies the maximum possible score is 10. A score  $\geq 6$  was considered as indicative of high-quality.

| <b>Author</b>   | <b>Study Design</b> | <b>Case definition adequate (1)</b> | <b>Representativeness of the cases (1)</b>  | <b>Selection of controls (1)</b> | <b>Definition of controls (1)</b> | <b>Comparability of cases and controls (2)</b> | <b>Ascertainment of exposure (2)</b>     | <b>Same methods for cases and controls (1)</b> | <b>Non-response rate (1)</b> | <b>High quality <math>\geq 6</math></b> |
|-----------------|---------------------|-------------------------------------|---------------------------------------------|----------------------------------|-----------------------------------|------------------------------------------------|------------------------------------------|------------------------------------------------|------------------------------|-----------------------------------------|
| Casellas 1998   | C-C                 | 1                                   | 0                                           | 1                                | 0                                 | 1                                              | 1                                        | 1                                              | 0                            | No                                      |
| Kumar 2014      | C-C                 | 1                                   | 1                                           | 1                                | 1                                 | 1                                              | 1                                        | 1                                              | 0                            | Yes                                     |
| Madsen 2003     | C-C                 | 1                                   | 0                                           | 1                                | 1                                 | 1                                              | 1                                        | 1                                              | 0                            | Yes                                     |
| Trespi 1999     | C-C                 | 1                                   | 0                                           | 0                                | 0                                 | 1                                              | 1                                        | 1                                              | 0                            | No                                      |
| Signoretti 2014 | C-C                 | 1                                   | 1                                           | 1                                | 1                                 | 1                                              | 1                                        | 1                                              | 0                            | Yes                                     |
| Mancilla 2008   | C-C                 | 1                                   | 1                                           | 0                                | 1                                 | 1                                              | 1                                        | 1                                              | 0                            | Yes                                     |
| Kim 2015        | C-C                 | 1                                   | 1                                           | 1                                | 1                                 | 0                                              | 1                                        | 1                                              | 0                            | Yes                                     |
|                 |                     |                                     | <b>Representativeness of the sample (1)</b> | <b>Sample size (1)</b>           | <b>Non-respondent (1)</b>         | <b>Comparability (2)</b>                       | <b>Ascertainment of the exposure (2)</b> | <b>Assessment of the outcome (2)</b>           | <b>Statistical test (1)</b>  | <b>High quality <math>&gt; 6</math></b> |
| Grigor'eva      | C-S                 | Na                                  | 1                                           | 1                                | 0                                 | 1                                              | 2                                        | 2                                              | 1                            | Yes                                     |
| Lembcke         | C-S                 | Na                                  | 1                                           | 0                                | 0                                 | 0                                              | 1                                        | 2                                              | 0                            | No                                      |

\*C-C = case-control study; C-S= cross sectional study.
